# Supplementary material
Source: PubMed Central journal article supplement (PMC2682887)

## Supporting Information

### Conformational Switching within Individual Amyloid Fibrils

Natallia Makarava<sup>a</sup>, Valeriy G. Ostapchenko<sup>a</sup>, Regina Savtchenko<sup>a</sup>, Ilia V. Baskakov<sup>a,b,\*</sup>

From the <sup>a</sup>Medical Biotechnology Center, University of Maryland Biotechnology Institute, Baltimore, MD 21201, USA; <sup>b</sup>Department of Biochemistry and Molecular Biology, University of Maryland, Baltimore, MD, 21201, USA

#### Supplemental Figures

**S1. Mo PrP abolishes formation of S-fibrils.** *a*, Electron microscopy images of fibrils produced from Ha PrP (left panel) and from a 99.9:0.1 mixture of Ha and Mo PrPs (right panel) under shaking. Scale bars = 0.2  $\mu\text{m}$ . *b*, Second derivatives of the FTIR spectra of fibrils produced from Ha PrP under shaking (black line), from a 99.9:0.1 mixture of Ha and Mo PrPs under shaking (red line), and from Ha PrP under rotation (green line).

**S2. Schematic diagram illustrating similarities between the cross-seeded fibrillation of Ha and Mo PrP *in vitro* and interspecies transmission of bovine prions.**

Sup. Figure 1

**a**

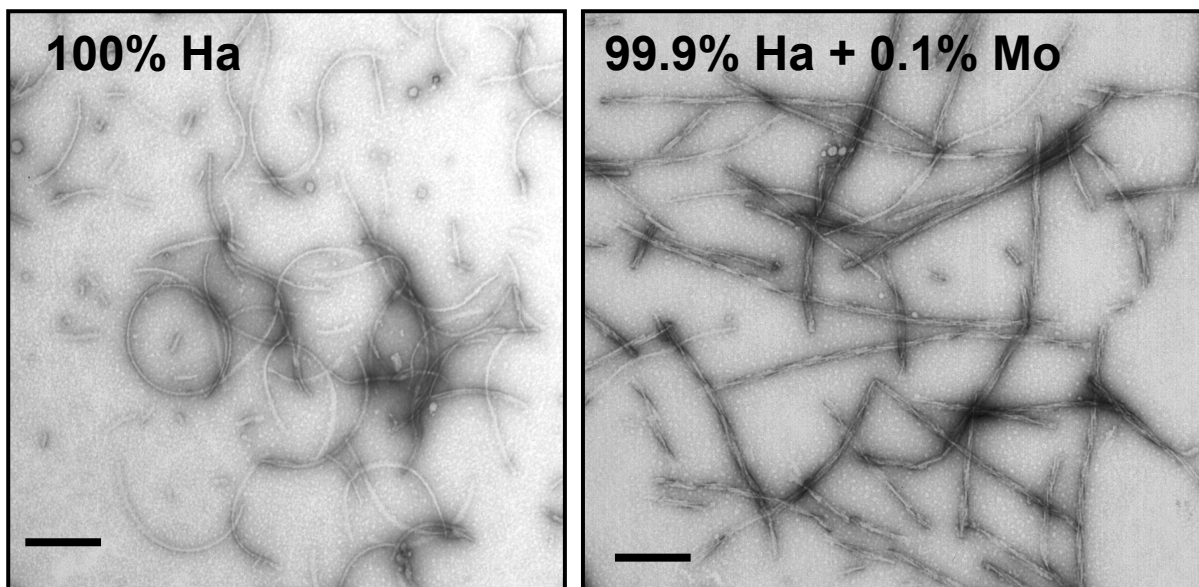

**b**

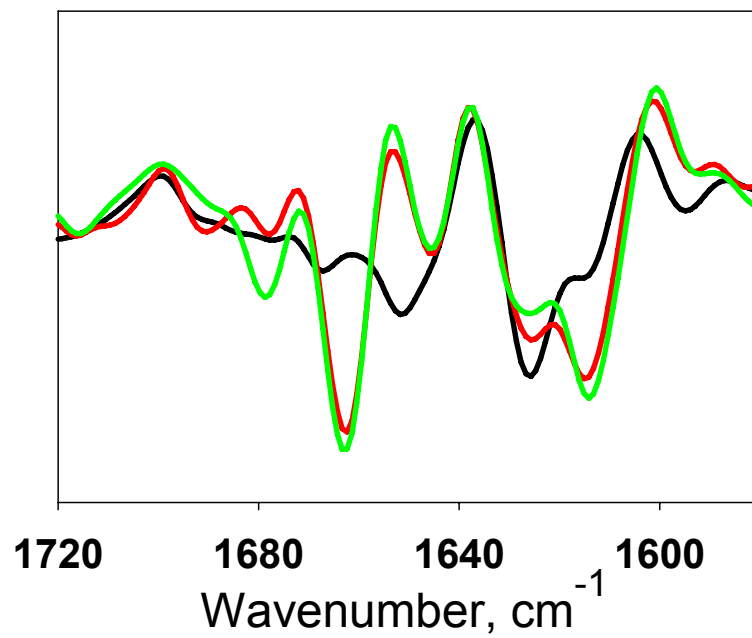

# Sup Figure 2

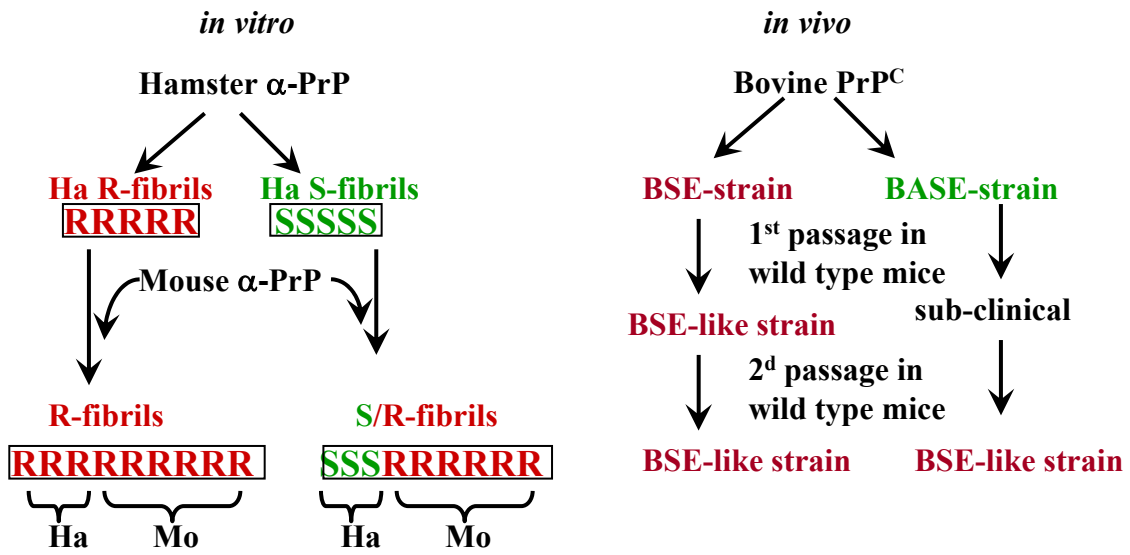

Supplement: M900533200_1.pdf [file M900533200_1.pdf]
